# Supplementary material for: Hemorrhagic Diathesis in Borrelia recurrentis Infection Imported to Germany
Source: PubMed Central journal article supplement (PMC4861516; doi:10.3201/eid2205.151557), 2016-05
Supplement: 15-1557-Techapp-s1.pdf [file 15-1557-Techapp-s1.pdf]

# Hemorrhagic Diathesis in *Borrelia recurrentis* Infection Imported to Germany

## Technical Appendix

**Technical Appendix Table.** Oligonucleotide sequences used for amplification\* of the *glpQ* (glycerophosphodiester phosphodiesterase) gene

| Primer name | Primer sequence                   | Annealing temperature |
|-------------|-----------------------------------|-----------------------|
| glpQ_seq_F  | 5'-ATTCATCAAAATATAAgTTATgAgAgg-3' | 52°C                  |
| glpQ_seq_R  | 5'-AgATATTCTCCTTATTTAAATTATgg-3'  | 52°C                  |

\*The PCR was run in 40 cycles.
